# Supplementary material for: The wings before the bird: an evaluation of flapping-based locomotory hypotheses in bird antecedents
Source: PeerJ. 2016 Jul 7;4:e2159. doi: 10.7717/peerj.2159 (PMC4941780; doi:10.7717/peerj.2159)
Supplement: Supplemental Information 3 — Spreadsheet for WAIR and leaping height calculations. [file peerj-04-2159-s003.xlsx]

## Sheet: W.A.I.R calculations
All
Taxa	Specimen	wing length (m)	span (m)	mass (kg)	Wing Area (m^2)	flap angle (rad)	flapping freq	flap amplitude	Strouhal No.	Speed (m/s)	Body Weights
Anchiornis	BMNHCPH828	0.157	0.3297	0.0944138	0.0132869	1.5708	15.1177	0.246615	2.48551	1.5	0.241408
GF
Taxa	Specimen	wing length (m)	span (m)	mass (kg)	Wing Area (m^2)	flap angle (rad)	flapping freq	flap amplitude	Strouhal No.	Speed (m/s)	Body Weights
Anchiornis	BMNHCPH828	0.157	0.3297	0.0944138	0.0132869	1.5708	14.1168	0.246615	2.32094	1.5	0.219151
MOD
Taxa	Specimen	wing length (m)	span (m)	mass (kg)	Wing Area (m^2)	flap angle (rad)	flapping freq	flap amplitude	Strouhal No.	Speed (m/s)	Body Weights
Anchiornis	BMNHCPH828	0.157	0.3297	0.0944138	0.0132869	1.5708	14.143	0.246615	2.32525	1.5	0.21972

## Sheet: Calculation of leaping height 
Size and Planform						Muscle Parameters
Body Mass (MB )	1	kg					prp Mass	Mass (kg)	anaerobic prp	Power output (W)
Hip height	0.15	m				Pectoral/Coracobr Muscle	0.1	0.1	0.5	27.5
Span	1	m				Hindlimb Muscle	0.3	0.3	0.2	60
Aspect Ratio	6					Total	0.4	0.4		87.5
Wing Area (S)	0.166667	m^2
Wing Loading (WL)	58.8	N/m
Lift Coefficient (CL)	1.5
Stall Speed	7.98372	m/s
launch time	0.0477387	flap angle (rad)	1.5708	radians
Unload distance	0.1125	flap time (climbout)	0.125628	seconds
Flap time (min cruise)	0.251256	flap amplitude (tip)	0.785398	meters
Launch Scalar	0.19	wing speed (tip)	6.25177	meters/second
downstroke force	4.62133	wing speed (50% spn)	3.12588	meters/second
downstroke accel	4.62133	req glenoid height	0.471239	meters
downstroke veloc gain	0.348341	initial upstroke time	0.00971453	seconds
Leap Only
Launch Angle and Velocity
Degrees	Radians	ballistic velocity	height gain	true hip height		acceleration (m/s^2)	required power (W)	required preload	GRF	acceleration (g mult)	time to peak
15	0.261799	2.35658	0.0189802	0.16898		49.3641	139.425	2.32375	49.3641	5.03716	0.0622375
20	0.349066	2.35658	0.0331445	0.183144		49.3641	139.425	2.32375	49.3641	5.03716	0.0822446
25	0.436332	2.35658	0.0506063	0.200606		49.3641	139.425	2.32375	49.3641	5.03716	0.101626
30	0.523599	2.35658	0.070835	0.220835		49.3641	139.425	2.32375	49.3641	5.03716	0.120234
35	0.610865	2.35658	0.093216	0.243216		49.3641	139.425	2.32375	49.3641	5.03716	0.137926
40	0.698132	2.35658	0.117069	0.267069		49.3641	139.425	2.32375	49.3641	5.03716	0.154569
45	0.785398	2.35658	0.14167	0.29167		49.3641	139.425	2.32375	49.3641	5.03716	0.170036
50	0.872665	2.35658	0.166271	0.316271		49.3641	139.425	2.32375	49.3641	5.03716	0.184209
55	0.959931	2.35658	0.190124	0.340124		49.3641	139.425	2.32375	49.3641	5.03716	0.196979
60	1.0472	2.35658	0.212505	0.362505		49.3641	139.425	2.32375	49.3641	5.03716	0.208251
65	1.13446	2.35658	0.232734	0.382734		49.3641	139.425	2.32375	49.3641	5.03716	0.217937
Wing Assist
Launch Angle and Velocity
Degrees	Radians	combined velocity	height gain	true hip height		acceleration (m/s^2)	required power (W)		GRF	acceleration (g mult)	wingstrokes
15	0.261799	2.52915	0.0218618	0.171862		52.9791	158.778		52.9791	5.40603	0.495411
20	0.349066	2.58463	0.0398697	0.18987		54.1411	165.264		54.1411	5.5246	0.654667
25	0.436332	2.63837	0.0634323	0.213432		55.2668	171.67		55.2668	5.63947	0.808942
30	0.523599	2.68996	0.0922946	0.242295		56.3476	177.935		56.3476	5.74976	0.95706
35	0.610865	2.73902	0.125926	0.275926		57.3753	183.994		57.3753	5.85462	1.09789
40	0.698132	2.78517	0.163524	0.313524		58.3419	189.787		58.3419	5.95326	1.23037
45	0.785398	2.82805	0.204028	0.354028		59.2403	195.25		59.2403	6.04493	1.35349
50	0.872665	2.86735	0.246158	0.396158		60.0635	200.323		60.0635	6.12893	1.4663
55	0.959931	2.90276	0.288467	0.438467		60.8052	204.95		60.8052	6.20462	1.56795
60	1.0472	2.93402	0.329405	0.479405		61.4599	209.078		61.4599	6.27142	1.65768
65	1.13446	2.96087	0.367397	0.517397		62.0225	212.658		62.0225	6.32883	1.73478
