# Supplementary material for: The wings before the bird: an evaluation of flapping-based locomotory hypotheses in bird antecedents
Source: PeerJ. 2016 Jul 7;4:e2159. doi: 10.7717/peerj.2159 (PMC4941780; doi:10.7717/peerj.2159)
Supplement: Supplemental Information 5 — Measurement data for non-avian and avian theropods used in this analysis. [file peerj-04-2159-s005.xlsx]

## Sheet: Sheet1
Taxa	Specimen	Reference	Humerus (mm)	forearm (mm)	Metacarpal II (mm)	FL (m)	Feather (m)	Femur (mm)	wing length (m)	span (m)	mass (kg) Christiansen and Farina 2004	mass (kg) Liu et al. 2012	mass (kg) Field et al. 2013	Wing Area (m^2)	Wing Loading (N/m)
Anchiornis	BMNHCPH828	Li et al. 2010	40	35	20	0.095	0.062	43	0.157	0.3297	0.0944138	-	-	0.0132869	69.6366
Anchiornis	LPM B00169	Sullivan et al. 2010	69	55	34	0.158	0.078	66	0.236	0.4956	0.375466	-	-	0.0251269	146.439
Archaeopteryx	11th	Foth et al. 2014	65.6	62.5	31.5	0.1596	0.148	-	0.3076	0.64596	-	0.243446	-	0.0621414	38.3927
Archaeopteryx	11th	Foth et al. 2014	65.6	62.5	31.5	0.1596	0.148	-	0.3076	0.64596	-	-	0.361406	0.0621414	56.9955
Archaeopteryx	Berlin	Mayr et al. 2007	63	56.2	28	0.1472	0.145	-	0.2922	0.61362	-	0.226966	-	0.0578337	38.4597
Archaeopteryx	Berlin	Mayr et al. 2007	62	56	28	0.146	0.145	-	0.291	0.6111	-	-	0.321555	0.0575962	54.7126
Archaeopteryx	London	Elzanowski 2002	75	67	34.4	0.1764	0.15	-	0.3264	0.68544	-	0.307048	-	0.0668304	45.0255
Archaeopteryx	London	Elzanowski 2002	75	67	34.4	0.1764	0.15	-	0.3264	0.68544	-	-	0.476849	0.0668304	69.9251
Archaeopteryx	Munich	Mayr et al. 2007, Nudds and Dyke 2010	55	53	25	0.133	0.129	-	0.262	0.5502	-	0.179364	-	0.0461343	38.1012
Archaeopteryx	Munich	Mayr et al. 2007, Nudds and Dyke 2010	55	53	25	0.133	0.129	-	0.262	0.5502	-	-	0.250931	0.0461343	53.3037
Archaeopteryx	Thermopolis	Mayr et al. 2007	56.9	50.9	23.5	0.1313	0.14	-	0.2713	0.56973	-	0.19024	-	0.0518454	35.9597
Archaeopteryx	Thermopolis	Mayr et al. 2007	56.9	50.9	23.5	0.1313	0.14	-	0.2713	0.56973	-	-	0.269207	0.0518454	50.8865
Archaeopteryx	Eichstatt	Mayr et al. 2007	41.5	36.5	17.8	0.0958	0.09	-	0.1858	0.39018	-	0.110085	-	0.0228255	47.2645
Archaeopteryx	Eichstatt	Mayr et al. 2007	41.5	36.5	17.8	0.0958	0.09	-	0.1858	0.39018	-	-	0.140076	0.0228255	60.1408
Aurornis	YFGP-T5198	Godefroit et al. 2013	58	57	34	0.149	0.075	66	0.224	0.4704	0.375466	-	-	0.022932	160.456
Caudipteryx	IVPP 12344	Zhou and Wang 2000	73	61	29	0.163	0.182	152	0.345	0.7245	5.5195	-	-	0.0857083	631.107
Caudipteryx	IVPP 12430	Sullivan et al. 2010	70	61	30	0.161	0.114	135	0.275	0.5775	3.76648	-	-	0.0427928	862.564
Changyuraptor	HG B016	Han et al. 2014	149	126	73	0.348	0.33	153	0.678	1.4238	5.63736	-	-	0.305405	180.895
Citipati	MPC-D100/971	Lu et al. 2013	20	-	-	0.05	-	36	0.106962	0.224621	0.0532607	-	-	0.00131426	397.147
Confuciusornis	GMV 2130	Chiappe et al. 1999	48	41	21	0.11	0.21	-	0.32	0.672	-	0.141665	-	0.091728	15.1351
Confuciusornis	GMV 2130	Chiappe et al. 1999	48	41	21	0.11	0.21	-	0.32	0.672	-	-	0.18931	0.091728	20.2254
Eoconfuciusornis	IVPP 11977	Sullivan et al. 2010	38	35	18	0.091	0.128	-	0.219	0.4599	-	0.0944946	-	0.0382637	24.2017
Eoconfuciusornis	IVPP 11977	Sullivan et al. 2010	38	35	18	0.091	0.128	-	0.219	0.4599	-	-	0.116723	0.0382637	29.8948
Eosinopteryx	YFGP-T5197	Godefroit et al. 2013	37.9	42	21	0.1009	0.05685	48.5	0.15775	0.331275	0.139143	-	-	0.0122414	111.392
Jeholornis	LPM0193	Ji et al. 2003	79.8	83.4	36.7	0.1999	0.21	-	0.4099	0.86079	-	0.341904	-	0.117498	28.5167
Jeholornis	LPM0193	Ji et al. 2003	79.8	83.4	36.7	0.1999	0.21	-	0.4099	0.86079	-	-	0.542188	0.117498	45.2217
Jeholornis	IVPPV13274	Zhou and Zhang 2002	110	109	47	0.266	0.28		0.546	1.1466	-	0.596356	-	0.208681	28.0058
Jeholornis	IVPPV13274	Zhou and Zhang 2002	110	109	47	0.266	0.28		0.546	1.1466	-	-	1.05363	0.208681	49.48
Jianchangosaurus	41HIII-0308A	Pu et al. 2013	158.5	124.3	61	0.3438	0.053	206	0.3968	0.83328	14.6987	-	-	0.0287065	5017.95
Jinfengopteryx	CAGS-IG 04-0801	Ji et al. 2005	49.2	43.3	21.4	0.1139	0.06	70.3	0.1739	0.36519	0.46014	-	-	0.0142424	316.616
Mahakala	IGM 100/1033	Turner et al. 2011	40	40	18	0.098	0.104	79	0.202	0.4242	0.670123	-	-	0.0286759	229.015
Mei long	DNHM D2154	Gao et al. 2012	36	34	13	0.083	0.041	65	0.124	0.2604	0.357443	-	-	0.00693966	504.771
Mei long	IVPP V12733	Xu and Norell 2004	42	39	15	0.096	0.05	81	0.146	0.3066	0.726338	-	-	0.0099645	714.347
Microraptor	BMNHC PH 881	Li et al. 2012	47.4	44.7	31.8	0.1239	0.114	51.8	0.2379	0.49959	0.172017	-	-	0.0370196	45.537
Microraptor	IVPP V 13352	Xu et al. 2003, Sullivan et al. 2010	74	70	44	0.188	0.222	86	0.41	0.861	0.880956	-	-	0.124242	69.4881
Microraptor hanqingi	LVH 0026	Gong et al. 2012	92.6	82.5	52.2	0.2273	0.24	111.7	0.4673	0.98133	2.04563	-	-	0.153087	130.952
Oviraptor incertae sedis	MPC-D100/1018	Lu et al. 2013	17	-	-	0.04	-	30	0.090918	0.190928	0.0295995	-	-	0.000949552	305.486
Protoarchaeopteryx	GMV2125	Ji and Ji 1997	88	74	44	0.206	0.05	120	0.256	0.5376	2.57704	-	-	0.017472	1445.46
Sapeornis	41HIII0405	Pu et al. 2013	101	99	45	0.245	0.195	-	0.44	0.924	-	0.51434	-	0.117117	43.0385
Sapeornis	41HIII0405	Pu et al. 2013	101	99	45	0.245	0.195	-	0.44	0.924	-	-	0.882977	0.117117	73.8849
Sapeornis	IVPP V12698	Zhou and Zhang 2003	130	135	57	0.322	0.252		0.574	1.2054	-	0.796629	-	0.197445	39.5401
Sapeornis	IVPP V12698	Zhou and Zhang 2003	130	135	57	0.322	0.252		0.574	1.2054	-	-	1.48891	0.197445	73.9006
Similicaudipteryx	STM22-6	Xu et al. 2009, Dececchi and Larsson 2013	81	69	30	0.18	0.22	140	0.4	0.84	4.23472	-	-	0.12012	345.49
Similicaudipteryx	STM4-1	Xu et al. 2009, Dececchi and Larsson 2013	24	21	10	0.055	0.017	38	0.072	0.1512	0.0633961	-	-	0.00167076	371.856
Sinocalliopteryx	JMP-V-05-8-01	Sullivan et al. 2010	114	100	54	0.268	0.1	221	0.368	0.7728	18.4345	-	-	0.050232	3596.48
Sinornithodes	IVPP V9612	Russell and Dong 1993	83.2	69	37.1	0.1893	-	140	0.3141	0.65961	4.23472	-	-	0.0360684	1150.6
Sinornithosaurus	NGMC-91A	Ji et al. 2001	91	72	44	0.207	0.052	109.8	0.259	0.5439	1.93562	-	-	0.0183838	1031.84
Sinornithosaurus	see Sullivan et al. 2010	Sullivan et al. 2010	65	51	31	0.147	0.047	61	0.194	0.4074	0.291295	-	-	0.0124461	229.365
Sinosauropteryx	NICP 127587	Currie and Chen 2001	36	28	17	0.081	0.014	86	0.095	0.1995	0.880956	-	-	0.00181545	4755.5
Sinosauropteryx	NIGP 127586	Currie and Chen 2001	20.3	12.4	10	0.0427	0.0025	53.2	0.0452	0.09492	0.187451	-	-	0.000154245	11909.7
Sinovenator	IVPP V11977	Benson and Choiniere 2012	71	59	28.5	0.1585	0.08	118	0.2385	0.50085	2.4412	-	-	0.0260442	918.584
Tianyuraptor	STM1–3	Chan et al. 2013, Dececchi and Larsson 2013	129	97	57	0.283	0.108	200	0.391	0.8211	13.3635	-	-	0.0576412	2272.02
Troodon Embryo	MOR 246-1	Varricchio et al. 2002	20.3	-	-	0.05	-	35	0.0765864	0.160831	0.0486393	-	-	0.00222419	214.309
Xiaotingia	STM 27-2	Xu et al. 2011	71	65	24	0.16	0.08	84	0.24	0.504	0.816635	-	-	0.026208	305.366
Yixianosaurus	IVPP 12638	Dececchi et al. 2012	89	64	36	0.189	0.1	97	0.289	0.6069	1.29831	-	-	0.0394485	322.533
Yixianosaurus	IVPP 12638	Dececchi et al. 2012	89	64	36	0.189	0.1	109	0.289	0.6069	1.89055	-	-	0.0394485	469.66
Yulong	41HIII-0107	Lu et al. 2013	44.6	44.7	22.8	0.1121	0.07	72	0.1821	0.38241	0.496964	-	-	0.0173997	279.905
Zhenyuanlog	JPM-0008	Lu and Brussatte. 2015	121	102.9	55.7	0.2796	0.3025	193.4	0.5821	1.22241	11.994	-	-	0.228	515.53
