# Supplementary material for: The wings before the bird: an evaluation of flapping-based locomotory hypotheses in bird antecedents
Source: PeerJ. 2016 Jul 7;4:e2159. doi: 10.7717/peerj.2159 (PMC4941780; doi:10.7717/peerj.2159)
Supplement: Supplemental Information 6 — Humerus percentage of forelimb calculation compared to bodysize in avian and non-avian theropods. [file peerj-04-2159-s006.xlsx]

## Sheet: Sheet1
Taxa	specimen	Humerus	Ulna	MC II	Femur	H%	reference
Coelophysis*	AMNH 7223	120	65	39.2	209	53.5236	Rinehart et al. 2009		use radius instead of ulna
Coelophysis*	AMNH 7224	134	82	39.7	203	52.4052	Rinehart et al. 2009		use radius instead of ulna
Coelophysis*	CM81768	72.6	48	18.8	130.4	52.0803	Rinehart et al. 2009		use radius instead of ulna
Coelophysis*	TMP 84 63 32	64.6	43	17.1	-	51.8043	Rinehart et al. 2009		use radius instead of ulna
Caudipteryx	NGMC 97-4-A	70	61	29	149	43.75	Benson and choinere
Caudipteryx	IVPP V 12344	73	61	29	152	44.7853	Zhou and Wang 2000
Caudipteryx	BPM 0001	72	62	28	145	44.4444	Zhou et al. 2001
Caudipteryx	IVPP V 12430	69	61	28	145	43.6709	Zhou et al. 2001
Anchiornis	BMNH 822	69	60.8	36.2	68.8	41.5663	Pu pers com
Anchiornis	BMNH823	67.8	55.5	28.3	67.7	44.723	Pu pers com
Anchiornis	PKUPV1067	72.2	58.5	35	90.5	43.5727	Pu pers com
Anchiornis	BMNH 804	45.7	39.8	18.9	50.9	43.7739	Pu pers com
Anchiornis	LPM-B00169	69	55.1	33.9	66.2	43.6709	Hu et al. 2009
Anchiornis	IVPP V14378	41.5	37.1	20.2	43.2	42.004	Xu et al. 2008
Anchiornis	BMNHC PH828,	40	35.3	20	-	41.9727	Li et al. 2010
Microraptor "hanqingi"	LVH 0026	92.6	82.5	54.9	111.7	40.2609	Gong et al. 2012
Microraptor gui	BMNHC PH881.	47.4	44.7	29.8	51.8	38.8843	Li et al. 2012
Microraptor zhaoianus	CAGS 20-7-004	61.3	53.8	31.3	74.8	41.8716	Hwang et al. 2001
Microraptor zhaoianus	V12330	42	37	22.3	49.8	41.461	Xu pers com
Microraptor zhaoianus	IVPP V13972B	89.4	78.2	42.6	82.3	42.5309	O'Connor et al. 2012
Microraptor zhaoianus	IVPP V13352	83	70.3	45	97	41.8558	Dececchi and Larsson 2013, ulna from O'Connor et al. 2012
Archaeopteryx	Thermopolis	56.9	50.9	23.5	50.3	43.3359	Mayr et al. 2007.
Archaeopteryx	Munich	55	53	25	46.5	41.3534	Mayr et al. 2007.
Archaeopteryx	Berlin	63	56.2	24.8	52.2	43.75	Mayr et al. 2007.
Archaeopteryx	maxberg	72	62	33	58	43.1138	Mayr et al. 2007.
Archaeopteryx	London	75	67	34.4	61	42.517	Mayr et al. 2007.
Archaeopteryx	Eichstaatt	41.5	36.5	17.8	37	43.3194	Mayr et al. 2007.
Archaeopteryx	11th	65.6	62.5	31.5	55.3	41.1028	Foth et al. 2014
Sapeornis	D3078	98.5	97.2	43.3	56.7	41.2134	Gao et al. 2012
Sapeornis	V13396	95.2	92.5	39.5	57	41.9014	Gao et al. 2012
Sapeornis	V12698	126.5	133.1	57.1	80.4	39.9432	Gao et al. 2012
Sapeornis	V13275	122.6	123.6	52	74.4	41.1133	Gao et al. 2012
Sapeornis	D2523	133.5	124.2	51.4	71	43.1899	Gao et al. 2012
Sapeornis	IVPP 13276	123.2	124	52.9	72.1	41.053	Zhou and Zhang 2003
