# Supplementary material for: The wings before the bird: an evaluation of flapping-based locomotory hypotheses in bird antecedents
Source: PeerJ. 2016 Jul 7;4:e2159. doi: 10.7717/peerj.2159 (PMC4941780; doi:10.7717/peerj.2159)
Supplement: Supplemental Information 7 — Furcula width for Deinonychosaurians and early avians used to calculate body width estimate. [file peerj-04-2159-s007.xlsx]

## Sheet: Sheet1
Taxa	Furcula Width	Humerus	Ulna	Metacarpal II	Ph 1+2	Forelimb	Furcula/Humerus	Furcula/Forelimb	Reference
Xiaotingia	42	71	65	24	40	200	0.591549	0.21	Xu et al. 2011
NGMC 91	51.7	90.8	72.4	44.3	48.5	256	0.569383	0.201953	Ji et al. 2001
Sinornithosaurus	78	134	119	62.1	66.5	381.6	0.58209	0.204403	Ji et al. 2001
Mei long	36	42	40	15	43	140	0.857143	0.257143	Xu and Norell 2004
Anchiornis	28.8	41.5	37.1	21	30	129.6	0.693976	0.222222	Xu et al. 2009
Linheraptor	110	155	110	63	89	417	0.709677	0.263789	Xu et al. 2010
Microraptor zhaoianus	34	61.3	53.8	31.3	29.7	176.1	0.554649	0.193072	Hwang et al. 2002
Buietreraptor	73	135	110	-	-	NA	0.540741	NA	Makovicky et al. 2005
Archaeopteryx-Berlin	21	63.5	55	28	34.9	181.4	0.330709	0.115766	Yalden 1984
Archaeopteryx-London	30	74.6	67.2	34.4	42	218.2	0.402145	0.137489	Yalden 1984
Sapeornis	43.1	129.6	135.1	57.1	59.9	381.7	0.332562	0.112916	Zhou and Zhang 2003
Sapeornis	41.5	122.6	124	52	55	353.6	0.338499	0.117364	Zhou and Zhang 2003
Sapeornis	42.4	123.2	124	52.9	57.2	357.3	0.344156	0.118668	Zhou and Zhang 2003
Jianchangornis	26	76	83	33	34	226	0.342105	0.115044	Zhou et al. 2009
Pengornis	29	64.3	70.7	31.1	16.3	182.4	0.451011	0.158991	Zhou et al. 2008
Gansus	13.6	48.4	52.8	25.2	20.6	147	0.280992	0.092517	You et al. 2006
Bohaiornis	16	52	52.5	19.5	18.3	142.3	0.307692	0.112439	Li et al. 2014
