# Supplementary material for: The wings before the bird: an evaluation of flapping-based locomotory hypotheses in bird antecedents
Source: PeerJ. 2016 Jul 7;4:e2159. doi: 10.7717/peerj.2159 (PMC4941780; doi:10.7717/peerj.2159)
Supplement: Supplemental Information 8 — WAIR values using flap rate from regression from Jackson (2009) all taxa. [file peerj-04-2159-s008.xlsx]

## Sheet: All
Taxa	Specimen	flapping frequency (All)	Strouhal No.	Speed (m/s)	flap amplitude at 90 degrees	Body Weights	flap amplitude at 70 degrees	Body Weights	flap amplitude at 50 degrees	Body Weights
Anchiornis	BMNHCPH828	15.1177	2.48551	1.5	0.246615	0.241408	0.191812	0.17096	0.137008	0.112637
Anchiornis	LPM B00169	8.94671	2.21108	1.5	0.370708	0.097432	0.288328	0.0698957	0.205949	0.0469221
Archaeopteryx	11th	10.5479	3.39767	1.5	0.483177	0.697036	0.375804	0.478234	0.268432	0.300526
Archaeopteryx	11th	9.07741	2.924	1.5	0.483177	0.37383	0.375804	0.260275	0.268432	0.167221
Archaeopteryx	Berlin	10.8327	3.3147	1.5	0.458987	0.66981	0.35699	0.460634	0.254993	0.2905
Archaeopteryx	Berlin	9.48949	2.89178	1.5	0.457102	0.383059	0.355524	0.267001	0.253945	0.17183
Archaeopteryx	London	9.65743	3.30096	1.5	0.512708	0.5685	0.398773	0.391117	0.284838	0.246807
Archaeopteryx	London	8.16987	2.7925	1.5	0.512708	0.284627	0.398773	0.199103	0.284838	0.128819
Archaeopteryx	Munich	11.8462	3.2502	1.5	0.411549	0.656053	0.320093	0.452023	0.228638	0.285885
Archaeopteryx	Munich	10.4272	2.86088	1.5	0.411549	0.386965	0.320093	0.270018	0.228638	0.174056
Archaeopteryx	Thermopolis	11.5842	3.29112	1.5	0.426157	0.708571	0.331455	0.487622	0.236754	0.307839
Archaeopteryx	Thermopolis	10.1524	2.88433	1.5	0.426157	0.410288	0.331455	0.286054	0.236754	0.184165
Archaeopteryx	Eichstatt	14.2608	2.77471	1.5	0.291854	0.417147	0.226998	0.291995	0.162141	0.189105
Archaeopteryx	Eichstatt	13.0131	2.53196	1.5	0.291854	0.287025	0.226998	0.20286	0.162141	0.133264
Aurornis	YFGP-T5198	8.94671	2.09865	1.5	0.351858	0.0828033	0.273668	0.0597541	0.195477	0.0404563
Caudipteryx	IVPP 12344	3.22165	1.16393	1.5	0.541925	0.0102669	0.421497	0.00795922	0.301069	0.0059449
Caudipteryx	IVPP 12430	3.72516	1.07277	1.5	0.431969	0.00689236	0.335976	0.00539812	0.239983	0.00408623
Changyuraptor	HG B016	3.19589	2.26908	1.5	1.065	0.113951	0.828333	0.0815094	0.591667	0.0544898
Citipati	MPC-D100/971	18.7917	2.10487	1.5	0.168016	0.0335886	0.130679	0.0242307	0.0933422	0.0163973
Confuciusornis	GMV 2130	12.9575	4.34209	1.5	0.502655	2.60913	0.390954	1.75171	0.279253	1.06453
Confuciusornis	GMV 2130	11.6058	3.88913	1.5	0.502655	1.6354	0.390954	1.10832	0.279253	0.68345
Eoconfuciusornis	IVPP 11977	15.1128	3.46592	1.5	0.344004	1.14034	0.267559	0.780923	0.191114	0.489344
Eoconfuciusornis	IVPP 11977	13.947	3.19855	1.5	0.344004	0.815945	0.267559	0.563061	0.191114	0.356948
Eosinopteryx	YFGP-T5197	13.0462	2.15518	1.5	0.247793	0.123666	0.192728	0.0889728	0.137663	0.0599779
Jeholornis	LPM0193	9.27079	3.97945	1.5	0.643869	1.20315	0.500787	0.813753	0.357705	0.500248
Jeholornis	LPM0193	7.78078	3.33987	1.5	0.643869	0.576321	0.500787	0.396055	0.357705	0.2495
Jeholornis	IVPPV13274	7.50426	4.29071	1.5	0.857655	1.38305	0.667065	0.929463	0.476475	0.565718
Jeholornis	IVPPV13274	6.04476	3.45621	1.5	0.857655	0.55534	0.667065	0.380407	0.476475	0.238467
Jianchangosaurus	41HIII-0308A	2.22041	0.922643	1.5	0.623292	0.00101936	0.484783	0.000813545	0.346273	0.000630911
Jinfengopteryx	CAGS-IG 04-0801	8.28136	1.5081	1.5	0.273161	0.0274925	0.212459	0.0206363	0.151756	0.0147617
Mahakala	IGM 100/1033	7.17896	1.51859	1.5	0.317301	0.0383275	0.24679	0.0287446	0.176278	0.020538
Mei long	DNHM D2154	9.11552	1.18367	1.5	0.194779	0.0130719	0.151495	0.0101124	0.10821	0.00753217
Mei long	IVPP V12733	6.96253	1.06451	1.5	0.229336	0.00825622	0.178373	0.00647258	0.127409	0.00490573
Microraptor	BMNHC PH 881	12.036	2.99852	1.5	0.373692	0.485837	0.29065	0.337403	0.207607	0.215954
Microraptor	IVPP V 13352	6.4702	2.77799	1.5	0.644026	0.284228	0.500909	0.19893	0.357792	0.12881
Microraptor hanqingi	LVH 0026	4.6977	2.29885	1.5	0.734033	0.136421	0.570915	0.0974406	0.407796	0.0650033
Oviraptor incertae sedis	MPC-D100/1018	23.4916	2.23661	1.5	0.142814	0.0474511	0.111077	0.0339966	0.0793409	0.02278
Protoarchaeopteryx	GMV2125	4.30302	1.15357	1.5	0.402124	0.00443985	0.312763	0.00344577	0.223402	0.00257751
Sapeornis	41HIII0405	7.93825	3.65768	1.5	0.69115	0.697495	0.537561	0.475295	0.383972	0.295578
Sapeornis	41HIII0405	6.46456	2.97866	1.5	0.69115	0.296466	0.537561	0.206026	0.383972	0.131998
Sapeornis	IVPP V12698	6.72237	4.04076	1.5	0.901637	0.889227	0.701273	0.600636	0.500909	0.36848
Sapeornis	IVPP V12698	5.30042	3.18604	1.5	0.901637	0.328107	0.701273	0.226504	0.500909	0.143673
Similicaudipteryx	STM22-6	3.56292	1.49243	1.5	0.628319	0.0248811	0.488692	0.0187001	0.349066	0.0134002
Similicaudipteryx	STM4-1	17.588	1.3261	1.5	0.113097	0.0201345	0.0879646	0.0153561	0.0628319	0.0112239
Sinocalliopteryx	JMP-V-05-8-01	2.03732	0.78512	1.5	0.578053	0.00122607	0.449597	0.000998118	0.321141	0.000793591
Sinornithodes	IVPP V9612	3.56292	1.17193	1.5	0.493387	0.00567318	0.383746	0.00439424	0.274104	0.00327844
Sinornithosaurus	NGMC-91A	4.79742	1.30118	1.5	0.406836	0.00710145	0.316428	0.00542893	0.22602	0.00398066
Sinornithosaurus	see Sullivan et al. 2010	9.85266	2.00163	1.5	0.304734	0.0543558	0.237016	0.0394396	0.169297	0.0269108
Sinosauropteryx	NICP 127587	6.4702	0.64368	1.5	0.149226	0.000786133	0.116064	0.000655262	0.0829031	0.000536297
Sinosauropteryx	NIGP 127586	11.6494	0.551404	1.5	0.071	0.000279644	0.0552222	0.000237214	0.0394444	0.000198274
Sinovenator	IVPP V11977	4.39249	1.09705	1.5	0.374635	0.00662457	0.291383	0.00517384	0.208131	0.00390217
Tianyuraptor	STM1–3	2.30224	0.942663	1.5	0.614181	0.00229848	0.477697	0.00182951	0.341212	0.00141399
Troodon Embryo	MOR 246-1	19.4511	1.56	1.5	0.120302	0.0423153	0.0935679	0.0316308	0.0668342	0.0224983
Xiaotingia	STM 27-2	6.65931	1.67367	1.5	0.376991	0.0323931	0.293215	0.0240077	0.20944	0.016876
Yixianosaurus	IVPP 12638	5.58362	1.68983	1.5	0.45396	0.0310408	0.35308	0.0229788	0.2522	0.0161267
Yixianosaurus	IVPP 12638	4.84057	1.46495	1.5	0.45396	0.0179015	0.35308	0.0134853	0.2522	0.00969353
Yulong	41HIII-0107	8.0426	1.53368	1.5	0.286042	0.0317359	0.222477	0.0237722	0.158912	0.016957
Zhenyuanlog	JPM-0008	2.3988	1.46225	1.5	0.914361	0.016273	0.711169	0.0122613	0.507978	0.00881641
