# Supplementary material for: The wings before the bird: an evaluation of flapping-based locomotory hypotheses in bird antecedents
Source: PeerJ. 2016 Jul 7;4:e2159. doi: 10.7717/peerj.2159 (PMC4941780; doi:10.7717/peerj.2159)
Supplement: Supplemental Information 9 — WAIR values using flap rate from regression of ground foraging birds from Jackson (2009). [file peerj-04-2159-s009.xlsx]

## Sheet: GF
Taxa	Specimen	flapping frequency (GF)	Strouhal No.	Speed (m/s)	flap amplitude at 90 degrees	Body Weights	flap amplitude at 70 degrees	Body Weights	flap amplitude at 50 degrees	Body Weights
Anchiornis	BMNHCPH828	14.1168	2.48551	1.5	0.246615	0.219151	0.191812	0.156366	0.137008	0.104152
Anchiornis	LPM B00169	8.23982	2.21108	1.5	0.370708	0.0871187	0.288328	0.0630862	0.205949	0.0429238
Archaeopteryx	11th	9.7567	3.39767	1.5	0.483177	0.618584	0.375804	0.4276	0.268432	0.271776
Archaeopteryx	11th	8.36338	2.924	1.5	0.483177	0.331291	0.375804	0.232611	0.268432	0.151334
Archaeopteryx	Berlin	10.0271	3.3147	1.5	0.458987	0.595466	0.35699	0.412594	0.254993	0.263174
Archaeopteryx	Berlin	8.75327	2.89178	1.5	0.457102	0.340167	0.355524	0.239092	0.253945	0.15579
Archaeopteryx	London	8.91229	3.30096	1.5	0.512708	0.503163	0.398773	0.348886	0.284838	0.222777
Archaeopteryx	London	7.50639	2.7925	1.5	0.512708	0.251606	0.398773	0.177575	0.284838	0.116411
Archaeopteryx	Munich	10.9911	3.2502	1.5	0.411549	0.585625	0.320093	0.406473	0.228638	0.259941
Archaeopteryx	Munich	9.64214	2.86088	1.5	0.411549	0.344991	0.320093	0.242694	0.228638	0.15834
Archaeopteryx	Thermopolis	10.7417	3.29112	1.5	0.426157	0.631727	0.331455	0.437953	0.236754	0.279573
Archaeopteryx	Thermopolis	9.38137	2.88433	1.5	0.426157	0.365319	0.331455	0.256792	0.236754	0.167344
Archaeopteryx	Eichstatt	13.2961	2.77471	1.5	0.291854	0.376695	0.226998	0.265625	0.162141	0.173907
Archaeopteryx	Eichstatt	12.1037	2.53196	1.5	0.291854	0.258986	0.226998	0.184491	0.162141	0.122599
Aurornis	YFGP-T5198	8.23982	2.09865	1.5	0.351858	0.0741784	0.273668	0.0540423	0.195477	0.0370881
Caudipteryx	IVPP 12344	2.88841	1.16393	1.5	0.541925	0.00915627	0.421497	0.0071961	0.301069	0.00547175
Caudipteryx	IVPP 12430	3.35263	1.07277	1.5	0.431969	0.00619736	0.335976	0.0049182	0.239983	0.00378673
Changyuraptor	HG B016	2.86471	2.26908	1.5	1.065	0.0981483	0.828333	0.071083	0.591667	0.0483743
Citipati	MPC-D100/971	17.6482	2.10487	1.5	0.168016	0.0308747	0.130679	0.0224347	0.0933422	0.0153393
Confuciusornis	GMV 2130	12.0506	4.34209	1.5	0.502655	2.32071	0.390954	1.56763	0.279253	0.961797
Confuciusornis	GMV 2130	10.7622	3.88913	1.5	0.502655	1.45176	0.390954	0.990545	0.279253	0.617221
Eoconfuciusornis	IVPP 11977	14.1121	3.46592	1.5	0.344004	1.02614	0.267559	0.707308	0.191114	0.44762
Eoconfuciusornis	IVPP 11977	12.996	3.19855	1.5	0.344004	0.733375	0.267559	0.509622	0.191114	0.326478
Eosinopteryx	YFGP-T5197	12.1353	2.15518	1.5	0.247793	0.112152	0.192728	0.0813608	0.137663	0.0555008
Jeholornis	LPM0193	8.54629	3.97945	1.5	0.643869	1.05756	0.500787	0.720463	0.357705	0.447861
Jeholornis	LPM0193	7.13972	3.33987	1.5	0.643869	0.505555	0.500787	0.350335	0.357705	0.2235
Jeholornis	IVPPV13274	6.87944	4.29071	1.5	0.857655	1.20257	0.667065	0.814185	0.476475	0.501299
Jeholornis	IVPPV13274	5.51001	3.45621	1.5	0.857655	0.481747	0.667065	0.332932	0.476475	0.21153
Jianchangosaurus	41HIII-0308A	1.97134	0.922643	1.5	0.623292	0.00091257	0.484783	0.000739076	0.346273	0.000583856
Jinfengopteryx	CAGS-IG 04-0801	7.61155	1.5081	1.5	0.273161	0.0248834	0.212459	0.0188736	0.151756	0.0136932
Mahakala	IGM 100/1033	6.57355	1.51859	1.5	0.317301	0.0345288	0.24679	0.0261792	0.176278	0.0189834
Mei long	DNHM D2154	8.39942	1.18367	1.5	0.194779	0.0119823	0.151495	0.00936511	0.10821	0.00707
Mei long	IVPP V12733	6.37024	1.06451	1.5	0.229336	0.00754782	0.178373	0.0059834	0.127409	0.00460046
Microraptor	BMNHC PH 881	11.1719	2.99852	1.5	0.373692	0.434931	0.29065	0.304347	0.207607	0.197012
Microraptor	IVPP V 13352	5.90837	2.77799	1.5	0.644026	0.249092	0.500909	0.176015	0.357792	0.115594
Microraptor hanqingi	LVH 0026	4.2538	2.29885	1.5	0.734033	0.119046	0.570915	0.0859886	0.407796	0.0582959
Oviraptor incertae sedis	MPC-D100/1018	22.1921	2.23661	1.5	0.142814	0.0438928	0.111077	0.0316503	0.0793409	0.0214051
Protoarchaeopteryx	GMV2125	3.88743	1.15357	1.5	0.402124	0.00399235	0.312763	0.00313819	0.223402	0.00238672
Sapeornis	41HIII0405	7.28807	3.65768	1.5	0.69115	0.610654	0.537561	0.419432	0.383972	0.264019
Sapeornis	41HIII0405	5.90309	2.97866	1.5	0.69115	0.259165	0.537561	0.181787	0.383972	0.118093
Sapeornis	IVPP V12698	6.14483	4.04076	1.5	0.901637	0.770963	0.701273	0.524894	0.500909	0.325979
Sapeornis	IVPP V12698	4.81484	3.18604	1.5	0.901637	0.283947	0.701273	0.1979	0.500909	0.127344
Similicaudipteryx	STM22-6	3.20286	1.49243	1.5	0.628319	0.021961	0.488692	0.0167248	0.349066	0.0122006
Similicaudipteryx	STM4-1	16.489	1.3261	1.5	0.113097	0.0187256	0.0879646	0.0143972	0.0628319	0.0106368
Sinocalliopteryx	JMP-V-05-8-01	1.80469	0.78512	1.5	0.578053	0.00110602	0.449597	0.00091357	0.321141	0.000739504
Sinornithodes	IVPP V9612	3.20286	1.17193	1.5	0.493387	0.00507135	0.383746	0.00398093	0.274104	0.00302235
Sinornithosaurus	NGMC-91A	4.3465	1.30118	1.5	0.406836	0.00636666	0.316428	0.00492773	0.22602	0.00367288
Sinornithosaurus	see Sullivan et al. 2010	9.09725	2.00163	1.5	0.304734	0.0489397	0.237016	0.0358432	0.169297	0.0247819
Sinosauropteryx	NICP 127587	5.90837	0.64368	1.5	0.149226	0.000733578	0.116064	0.000617847	0.0829031	0.000512045
Sinosauropteryx	NIGP 127586	10.8037	0.551404	1.5	0.071	0.0002654	0.0552222	0.00022699	0.0394444	0.000191581
Sinovenator	IVPP V11977	3.9704	1.09705	1.5	0.374635	0.00597528	0.291383	0.00472616	0.208131	0.00362335
Tianyuraptor	STM1–3	2.04593	0.942663	1.5	0.614181	0.00205685	0.477697	0.00166124	0.341212	0.00130785
Troodon Embryo	MOR 246-1	18.2842	1.56	1.5	0.120302	0.0392778	0.0935679	0.0295844	0.0668342	0.0212624
Xiaotingia	STM 27-2	6.08568	1.67367	1.5	0.376991	0.0289939	0.293215	0.0217256	0.20944	0.0155042
Yixianosaurus	IVPP 12638	5.07905	1.68983	1.5	0.45396	0.0276164	0.35308	0.0206808	0.2522	0.0147463
Yixianosaurus	IVPP 12638	4.38663	1.46495	1.5	0.45396	0.0159617	0.35308	0.0121719	0.2522	0.00889493
Yulong	41HIII-0107	7.38641	1.53368	1.5	0.286042	0.0286786	0.222477	0.0217089	0.158912	0.0157079
Zhenyuanlog	JPM-0008	2.13405	1.46225	1.5	0.914361	0.0142097	0.711169	0.0108634	0.507978	0.00796568
