# Supplementary material for: The wings before the bird: an evaluation of flapping-based locomotory hypotheses in bird antecedents
Source: PeerJ. 2016 Jul 7;4:e2159. doi: 10.7717/peerj.2159 (PMC4941780; doi:10.7717/peerj.2159)
Supplement: Supplemental Information 12 — Take off calculations for passerine birds from Jackson (2009). [file peerj-04-2159-s012.xlsx]

## Sheet: Sheet1
			90 degree						70 degree						50 degree						Take off Speed (Bw=1)
			ALL		GF		MOD		ALL		GF		MOD		ALL		GF		MOD
OUT	Specimen	V=0	V=10	%	V=10	%	V=10	%	V=10	%	V=10	%	V=10	%	V=10	%	V=10	%	V=10	%	All	Acheivable	GF		MOD
Anchiornis	LPM B00169	2	2.63252	31.6259	2.56095	28.0473	2.82111	41.0553	2.3997	19.9852	2.35709	17.8546	2.51265	25.6327	2.22385	11.1924	2.2023	10.1151	2.28282	14.1412	9.28	no	9.54471	no	8.79502	no
Anchiornis	BMNHCPH828	2	3.58287	79.1433	3.32478	66.2388	3.41771	70.8853	2.9897	49.4848	2.8348	41.7399	2.88786	44.3932	2.54509	27.2546	2.4654	23.27	2.49394	24.6971	4.96	no	5.2069	no	5.20043	no
Archaeopteryx mass from Liu et al. 2012	11th	2	10.4138	420.688	8.92238	346.119	11.3909	469.545	6.99522	249.761	6.15169	207.585	7.52981	276.491	4.58022	129.011	4.1693	108.465	4.84641	142.32	1.3547	flight	1.737	flight	0.967615	flight
Archaeopteryx mass from Field et al. 2013	11th	2	4.96686	148.343	4.47667	123.834	5.84351	192.176	3.82673	91.3363	3.53581	76.7903	4.34082	117.041	2.98201	49.1005	2.83433	41.7163	3.24485	62.2426	3.47427	flight	3.81927	flight	2.85767	flight
Archaeopteryx mass from Liu et al. 2012	Berlin	2	11.3118	465.59	9.68526	384.263	11.9062	495.31	7.49669	274.835	6.58534	229.267	7.81187	290.593	4.82573	141.287	4.38528	119.264	4.98516	149.258	1.48479	flight	1.85453	flight	1.16225	flight
Archaeopteryx mass from Field et al. 2013	Berlin	2	5.0277	151.385	4.52737	126.368	5.78942	189.471	3.86426	93.2128	3.56755	78.3774	4.30994	115.497	3.00288	50.1441	2.85232	42.6159	3.23109	61.5544	3.36357	flight	3.7001	flight	2.83838	flight
Archaeopteryx mass from Liu et al. 2012	Eichstatt	2	9.86217	393.108	8.49766	324.883	7.94839	297.42	6.68075	234.038	5.90878	195.439	5.58017	179.008	4.43178	121.589	4.05536	102.768	3.89877	94.9387	3	flight	3.27735	flight	3.17487	flight
Archaeopteryx mass from Field et al. 2013	Eichstatt	2	3.58768	79.384	3.33305	66.6526	3.56232	78.1161	2.99352	49.6762	2.84075	42.0376	2.97572	48.7862	2.54813	27.4065	2.46953	23.4765	2.54029	27.0144	4.28	no	4.54172	no	4.30807	no
Archaeopteryx mass from Liu et al. 2012	London	2	5.56817	178.409	4.9363	146.815	6.39124	219.562	4.18547	109.273	3.81177	90.5885	4.66465	133.233	3.16561	58.2803	2.97653	48.8266	3.4103	70.5148	2.03	flight	2.41688	flight	1.47304	flight
Archaeopteryx mass from Field et al. 2013	London	2	3.52194	76.0971	3.27622	63.811	4.12685	106.343	2.94846	47.4229	2.80097	40.0486	3.30879	65.4395	2.51866	25.933	2.44294	22.1472	2.70451	35.2254	4.52	no	4.85771	no	3.72908	flight
Archaeopteryx mass from Liu et al. 2012	Munich	2	12.7447	537.237	10.7133	435.663	12.0348	501.74	8.28716	314.358	7.16289	258.145	7.87705	293.853	5.20661	160.331	4.6688	133.44	5.01948	150.974	1.55	flight	1.90328	flight	1.41242	flight
Archaeopteryx mass from Field et al. 2013	Munich	2	4.55561	127.78	4.13662	106.831	4.97129	148.564	3.58019	79.0096	3.33077	66.5384	3.82323	91.1615	2.85519	42.7595	2.72813	36.4065	2.981	49.0502	3.331	flight	3.63322	flight	2.9635	flight
Archaeopteryx mass from Liu et al. 2012	Thermopolis	2	9.74389	387.194	8.04533	302.267	9.92991	396.495	6.61526	230.763	5.64801	182.401	6.70734	235.367	4.39634	119.817	3.92094	96.047	4.44768	122.384	1.31	flight	1.66581	flight	1.12175	flight
Archaeopteryx mass from Field et al. 2013	Thermopolis	2	4.82603	141.301	4.36084	118.042	5.36261	168.131	3.74384	87.1918	3.46756	73.3782	4.05738	102.869	2.94137	47.0686	2.80094	40.0469	3.10287	55.1436	3	flight	3.42914	flight	2.70233	flight
Aurornis	YFGP-T5198	2	2.52296	26.1479	2.44019	22.0097	2.67763	33.8813	2.33186	16.593	2.28177	14.0885	2.4246	21.23	2.18724	9.36201	2.16114	8.0571	2.23579	11.7895	10.0405	no	10.2892	no	9.57765	no
Caudipteryx	IVPP 12430	2	2.03024	1.51182	2.02553	1.27635	2.06791	3.39558	2.02063	1.03166	2.01763	0.881264	2.04377	2.18874	2.01298	0.648965	2.01124	0.561856	2.02552	1.27623	24.4099	no	24.5905	no	23.1777	no
Caudipteryx	IVPP 12344	2	2.0481	2.40516	2.04081	2.04037	2.12138	6.06887	2.03247	1.62362	2.02791	1.39537	2.07724	3.86186	2.02014	1.0072	2.01759	0.879252	2.04407	2.2037	28.9691	no	29.13	no	27.9839	no
Changyuraptor	HG B016	2	3.54383	77.1913	2.38651	19.3253	3.28123	64.0613	2.94865	47.4324	2.24575	12.2873	2.78557	39.2784	2.50187	25.0937	2.13887	6.94358	2.41693	20.8465	8.45712	no	8.80982	no	6.03674	no
Eosinopteryx	YFGP-T5197	2	2.81294	40.647	2.71118	35.5591	2.80022	40.0112	2.51413	25.7064	2.4537	22.6851	2.50514	25.2572	2.2885	14.4252	2.25811	12.9057	2.28451	14.2255	7.75586	no	7.98159	no	7.78607	no
Jianchangosaurus	41HIII-0308A	2	2.00438	0.219147	2.00384	0.192112	2.0136	0.67975	2.00305	0.152254	2.0027	0.135042	2.00872	0.435839	2.00196	0.0978793	2.00176	0.0878985	2.00504	0.25193	72.3691	no	72.5243	no	71.025	no
Jinfengopteryx	CAGS-IG 04-0801	2	2.1971	9.8548	2.16253	8.12652	2.27159	13.5796	2.12841	6.42061	2.10718	5.35922	2.17349	8.67447	2.0757	3.78492	2.06428	3.21378	2.09966	4.98314	16.2639	no	16.4469	no	15.8522	no
Mahakala	IGM 100/1033	2	2.17792	8.89597	2.15037	7.51858	2.26661	13.3307	2.11699	5.84932	2.10005	5.00242	2.17086	8.5428	2.06994	3.49682	2.06077	3.03857	2.09868	4.93404	13.4782	no	13.6703	no	12.91	no
Mei long	IVPP V12733	2	2.04568	2.28417	2.03946	1.97277	2.0664	3.32006	2.03121	1.56059	2.02729	1.36462	2.04402	2.20102	2.01966	0.983131	2.01744	0.871904	2.02678	1.33898	21.6163	no	21.7558	no	21.37	no
Mei long	DNHM D2154	2	2.10957	5.47855	2.09595	4.79761	2.13607	6.80351	2.07285	3.64258	2.06449	3.2247	2.08898	4.44882	2.04426	2.21312	2.03973	1.9866	2.05306	2.6528	26.2306	no	26.3664	no	25.8084	no
Microrpator	IVPP V 13352	2	4.03285	101.642	3.4943	74.7149	5.42375	171.187	3.26092	63.0458	2.93656	46.8282	4.08664	104.332	2.68465	34.2326	2.51708	25.8541	3.10669	55.3344	2.52808	flight	2.85099	flight	2.42837	flight
Microrpator	BMNHC PH 881	2	5.98677	199.338	5.27705	163.852	6.15063	207.532	4.43817	121.909	4.01982	100.991	4.52776	126.388	3.30169	65.0847	3.08953	54.4763	3.35013	67.5064	4.51207	flight	4.8739	flight	3.25803	flight
Microraptor hanqingi	LVH 0026	2	2.83775	41.8877	2.70873	35.4363	3.74923	87.4617	2.52692	26.3458	2.44914	22.4572	3.07431	53.7157	2.29266	14.6328	2.25248	12.6239	2.57457	28.7284	7.49047	no	7.81631	no	5.85854	no
Microraptor hanqingi mass from Alexander et al. 2010	LVH 0026	2	4.32208	116.104	3.94935	97.4673	6.30149	215.074	3.43679	71.8394	3.21444	60.7218	4.6152	130.76	2.77741	38.8703	2.66398	33.199	3.37332	68.6662	4.29854	flight	4.67454	no	2.76457	flight
Protoarchaeopteryx	GMV2125	2	2.02024	1.01212	2.01766	0.883216	2.04169	2.08439	2.01369	0.684558	2.01209	0.604396	2.02683	1.34154	2.00852	0.425759	2.00762	0.381161	2.01561	0.780323	37.8536	no	38.0208	no	36.9463	no
Similicaudipteryx	STM4-1	2	2.11062	5.53096	2.10927	5.46362	2.08858	4.42885	2.07332	3.66605	2.07334	3.66714	2.05953	2.97627	2.04435	2.21756	2.0451	2.2548	2.03689	1.84437	17.1137	no	17.34	no	15.6802	no
Similicaudipteryx	STM22-6	2	2.13827	6.91365	2.11659	5.82931	2.33844	16.9222	2.09069	4.53467	2.07737	3.86859	2.21207	10.6036	2.05402	2.70086	2.04683	2.34136	2.1177	5.88493	18.0881	no	18.2124	no	18.3226	no
Sinocalliopteryx	JMP-V-05-8-01	2	2.0046	0.22999	2.004	0.200161	2.01437	0.71874	2.00326	0.163018	2.00287	0.143523	2.00934	0.4669	2.00214	0.107157	2.00191	0.0954162	2.00551	0.275629	61.2613	no	61.3957	no	60.0386	no
Sinornithodes	IVPP V9612	2	2.06	3	2.05	2.5	2.05	2.5	2.04	2	2.03	1.5	2.03	1.5	2.02	1	2.02	1	2.02	1	33.56	no	33.7364	no	32.433	no
Sinornithosaurus	NGMC-91A	2	2.03637	1.81862	2.02928	1.46409	2.07035	3.51756	2.02421	1.21037	2.01974	0.987168	2.04492	2.2459	2.01473	0.736462	2.01222	0.61077	2.02578	1.28901	31.4926	no	31.676	no	30.5922	no
Sinornithosaurus	see Sullivan et al. 2010	2	2.34282	17.1409	2.31398	15.6992	2.41163	20.5816	2.21838	10.9192	2.20167	10.0837	2.25955	12.9773	2.12403	6.2013	2.116	5.79982	2.14575	7.28725	12.7657	no	12.9959	no	12.4509	no
Sinosauropteryx	NICP 127587	2	2.00105	0.0526548	2	0	2.0011	0.0551853	2.00077	0.038666	2	0	2.00081	0.0403223	2.00053	0.0263263	2	0	2.00055	0.0274164	70.8329	no	70.9167	no	70.5423	no
Sinosauropteryx	NIGP 127586	2	2.00255	0.127622	2.00162	0.0811888	2.0037	0.184954	2.00185	0.0925316	2.00119	0.0594176	2.0026	0.129945	2.00124	0.0622445	2.00081	0.0403027	2.0017	0.0849421	112.796	no	112.856	no	112.767	no
Sinovenator	IVPP V11977	2	2.02761	1.38037	2.02368	1.18402	2.05511	2.7555	2.01881	0.940393	2.01634	0.816929	2.03572	1.78585	2.01181	0.590322	2.01041	0.520392	2.02101	1.05041	29.91	no	30.0681	no	29.0671	no
Tianyuraptor	STM1–3	2	2.01017	0.508278	2.00862	0.431194	2.03099	1.5495	2.00704	0.352005	2.00604	0.302229	2.01985	0.992415	2.00451	0.225447	2.00392	0.196086	2.01145	0.572598	48.2135	no	48.3709	no	46.8792	no
Xiaotingia	STM 27-2	2	2.21	10.4998	2.17598	8.79919	2.33053	16.5263	2.13569	6.78466	2.11494	5.74695	2.20855	10.4275	2.07894	3.94715	2.06792	3.39607	2.11724	5.86223	15.6834	no	15.8997	no	14.9643	no
Yixianosaurus	IVPP 12638	2	2.17709	8.85432	2.15255	7.62748	2.31813	15.9064	2.11461	5.7306	2.0997	4.9851	2.19994	9.99705	2.06685	3.34261	2.05898	2.94901	2.11159	5.57958	16.1636	no	16.3927	no	15.2065	no
Yixianosaurus	IVPP 12638	2	2.08619	4.30955	2.07467	3.73363	2.1711	8.55509	2.05677	2.83852	2.04972	2.48599	2.10836	5.41791	2.03403	1.7013	2.03023	1.51171	2.06131	3.06575	20.3662	no	20.5723	no	19.3637	no
Yulong	41HIII-0107	2	2.17137	8.5687	2.10686	5.34299	2.17137	8.5687	2.11067	5.53329	2.07111	3.55559	2.1104	5.52006	2.06431	3.2157	2.04321	2.16038	2.06431	3.2157	15.1184	no	15.3061	no	14.6687	no
Zhenyuanlog	JPM-0008	2	2.28	14	2.23	11.5	2.23	11.5	2.17	8.5	2.15	7.5	2.15	7.5	2.1	5	2.08	4	2.08	4	21.45	no	21.6885	no	19.4441	no
