# Supplementary material for: The wings before the bird: an evaluation of flapping-based locomotory hypotheses in bird antecedents
Source: PeerJ. 2016 Jul 7;4:e2159. doi: 10.7717/peerj.2159 (PMC4941780; doi:10.7717/peerj.2159)
Supplement: Supplemental Information 13 — Height gain due to flap based thrust for non-avian theropods and Archaeopteryx. [file peerj-04-2159-s013.xlsx]

## Sheet: Sheet1
Taxa	Specimen	span (m)	mass (kg) Christiansen and Farina 2004	mass (kg) Liu et al. 2012	mass (kg)Field et al. 2013	Wing Area (m^2)	Hindlimb length (m)	hip height (m) based on Bin jeffery et al. 2014 using 0.8 of total limb segment lengths (Ostrich)	Non-wing aidied height at 65 degrees	leaping at 90 flap angle	% gain	leaping at 70 flap angle	% gain	leaping at 50 flap angle	% gain
Anchiornis	BMNHCPH828	0.3297	0.0944138	-	-	0.0132869	~0.14	0.112	0.199207	0.251151	26.0755	0.240347	20.6519	0.230939	15.9288
Anchiornis	LPM B00169	0.4956	0.375466	-	-	0.0251269	0.2278	0.18224	0.268465	0.30788	14.6816	0.300286	11.8529	0.29356	9.3476
Archaeopteryx	11th	0.64596	-	0.243446	-	0.0621414	0.1736	0.13888	0.226738	0.422265	86.2344	0.371256	63.7379	0.329671	45.3974
Archaeopteryx	11th	0.64596	-	-	0.361406	0.0621414	0.1736	0.13888	0.227884	0.338698	48.6274	0.312123	36.9656	0.28978	27.1613
Archaeopteryx	Berlin	0.61362	-	0.226966	-	0.0578337	0.1602	0.12816	0.215114	0.388004	80.371	0.343252	59.5674	0.30664	42.5477
Archaeopteryx	Berlin	0.6111	-	-	0.321555	0.0575962	0.1602	0.12816	0.215824	0.320599	48.5465	0.295395	36.8684	0.274218	27.0563
Archaeopteryx	London	0.68544	-	0.307048	-	0.0668304	0.187	0.1496	0.237529	0.411526	73.2529	0.367162	54.5755	0.330662	39.2093
Archaeopteryx	London	0.68544	-	-	0.476849	0.0668304	0.187	0.1496	0.237712	0.330565	39.0612	0.30891	29.9514	0.290533	22.2206
Archaeopteryx	Munich	0.5502	-	0.179364	-	0.0461343	0.1585	0.1268	0.214606	0.378991	76.5983	0.337349	57.1944	0.303071	41.2221
Archaeopteryx	Munich	0.5502	-	-	0.250931	0.0461343	0.1585	0.1268	0.214511	0.315772	47.2051	0.29186	36.0581	0.271683	26.652
Archaeopteryx	Thermopolis	0.56973	-	0.19024	-	0.0518454	0.1645	0.1316	0.220599	0.408185	85.0346	0.360186	63.2761	0.320859	45.4491
Archaeopteryx	Thermopolis	0.56973	-	-	0.269207	0.0518454	0.1645	0.1316	0.220632	0.33392	51.3466	0.307013	39.1514	0.28437	28.8886
Archaeopteryx	Eichstatt	0.39018	-	0.110085	-	0.0228255	0.1202	0.09616	0.180423	0.257707	42.835	0.239832	32.9278	0.224662	24.5196
Archaeopteryx	Eichstatt	0.39018	-	-	0.140076	0.0228255	0.1202	0.09616	0.180718	0.236374	30.7974	0.224083	23.9961	0.213509	18.1451
Aurornis	YFGP-T5198	0.4704	0.375466	-	-	0.022932	0.2005	0.1604	0.248797	0.279135	12.1941	0.273358	9.87219	0.268227	7.80976
Caudipteryx	IVPP 12344	0.7245	5.5195	-	-	0.0857083	0.472	0.3776	0.421819	0.436131	3.39288	0.434211	2.93772	0.432432	2.51597
Caudipteryx	IVPP 12430	0.5775	3.76648	-	-	0.0427928	0.44	0.352	0.40592	0.415004	2.23782	0.413871	1.95874	0.412814	1.69849
Changyuraptor	HG B016	1.4238	5.63736	-	-	0.305405	0.45	0.36	0.411463	0.495435	20.408	0.478156	16.2087	0.463044	12.5358
Eosinopteryx	YFGP-T5197	0.331275	0.139143	-	-	0.0122414	0.1535	0.1228	0.209848	0.241201	14.941	0.235194	12.0786	0.229871	9.54177
Jianchangosaurus	41HIII-0308A	0.83328	14.6987	-	-	0.0287065	0.6936	0.55488	0.531968	0.534446	0.46572	0.534166	0.413139	0.533903	0.363716
Jinfengopteryx	CAGS-IG 04-0801	0.36519	0.46014	-	-	0.0142424	0.2308	0.18464	0.271552	0.285166	5.01349	0.283075	4.24353	0.281163	3.53951
Mahakala	IGM 100/1033	0.4242	0.670123	-	-	0.0286759	0.271	0.2168	0.298849	0.321797	7.6788	0.318253	6.49303	0.315019	5.41076
Mei long	DNHM D2154	0.2604	0.357443	-	-	0.00693966	0.2001	0.16008	0.248615	0.254741	2.4641	0.253931	2.13853	0.25318	1.83635
Mei long	IVPP V12733	0.3066	0.726338	-	-	0.0099645	0.245	0.196	0.281716	0.286975	1.867	0.286323	1.63533	0.285714	1.41918
Microraptor	BMNHC PH 881	0.49959	0.172017	-	-	0.0370196	0.1615	0.1292	0.217953	0.342188	57.0005	0.312544	43.3996	0.28767	31.9873
Microraptor	IVPP V 13352	0.861	0.880956	-	-	0.124242	0.2911	0.23288	0.313517	0.466631	48.8372	0.431691	37.6927	0.402028	28.2313
M.hanqingi	LVH 0026	0.98133	2.04563	-	-	0.153087	0.3242	0.25936	0.334138	0.411495	23.151	0.395464	18.3533	0.381477	14.1673
Protoarchaeopteryx	GMV2125	0.5376	2.57704	-	-	0.017472	0.367	0.2936	0.361798	0.366326	1.25152	0.365728	1.08615	0.365172	0.932584
Similicaudipteryx	STM22-6	0.84	4.23472	-	-	0.12012	0.423	0.3384	0.394412	0.421769	6.93615	0.417428	5.8357	0.413477	4.83378
Similicaudipteryx	STM4-1	0.1512	0.0633961	-	-	0.00167076	0.1157	0.09256	0.175906	0.180331	2.51578	0.179708	2.16158	0.179133	1.83464
Sinocalliopteryx	JMP-V-05-8-01	0.7728	18.4345	-	-	0.050232	0.69	0.552	0.529732	0.532939	0.605437	0.532611	0.543449	0.5323	0.484821
Sinornithodes	IVPP V9612	0.65961	4.23472	-	-	0.0360684	0.4486	0.35888	0.498965	0.508837	1.97851	0.507523	1.71526	0.506305	1.47102
Sinornithosaurus	NGMC-91A	0.5439	1.93562	-	-	0.0183838	0.3299	0.26392	0.338275	0.34428	1.77533	0.343419	1.52088	0.342626	1.28631
Sinosauropteryx	NICP 127587	0.1995	0.880956	-	-	0.00181545	0.25	0.2	0.28574	0.28682	0.378079	0.286644	0.316429	0.286483	0.260275
Sinosauropteryx	NIGP 127586	0.09492	0.187451	-	-	0.000154245	0.1542	0.12336	0.210831	0.210961	0.0618417	0.210951	0.057201	0.210942	0.0527414
Sinovenator	IVPP V11977	0.50085	2.4412	-	-	0.0260442	0.357	0.2856	0.355581	0.362279	1.8837	0.361421	1.64231	0.360622	1.41766
Tianyuraptor	STM1–3	0.8211	13.3635	-	-	0.0576412	0.601	0.4808	0.487331	0.492065	0.971451	0.491509	0.857288	0.490988	0.750302
Xiaotingia	STM 27-2	0.504	0.816635	-	-	0.026208	~0.25	0.2	0.284524	0.30182	6.0791	0.298918	5.05931	0.296292	4.13612
Yulong	41HIII-0107	0.38241	0.496964	-	-	0.0173997	0.2041	0.16328	0.252123	0.26603	5.51619	0.263809	4.63535	0.261787	3.83338
Zhenyuanlog	JPM-0008	1.22241	11.994	-	-	0.228	0.5835	0.4668	0.58724	0.623837	6.23199	0.618062	5.24853	0.612799	4.35232
