# Supplementary material for: The wings before the bird: an evaluation of flapping-based locomotory hypotheses in bird antecedents
Source: PeerJ. 2016 Jul 7;4:e2159. doi: 10.7717/peerj.2159 (PMC4941780; doi:10.7717/peerj.2159)
Supplement: Supplemental Information 17 — Body weight support values for ground based take off with a leaping speeds of 3.8, 4.1 and 5.1 m/s using flap rate from regression based on modified dataset adding galliform birds form Askew, Marsh & Ellington (2001) and Jackson (2009). [file peerj-04-2159-s017.xlsx]

## Sheet: MOD
Taxa	Speed (m/s)	flap amplitude at 143 degrees	Body Weights	flap amplitude at 90 degrees	Body Weights	flap amplitude at 70 degrees	Body Weights	flap amplitude at 50 degrees	Body Weights		Speed (m/s)	flap amplitude at 143 degrees	Body Weights	flap amplitude at 90 degrees	Body Weights	flap amplitude at 70 degrees	Body Weights	flap amplitude at 50 degrees	Body Weights		Speed (m/s)	flap amplitude at 143 degrees	Body Weights	flap amplitude at 90 degrees	Body Weights	flap amplitude at 70 degrees	Body Weights	flap amplitude at 50 degrees	Body Weights
Anchiornis	3.8	-	-	0.246615	0.703609	0.191812	0.561906	0.137008	0.43612		4.1	-	-	0.246615	0.762729	0.191812	0.614865	0.137008	0.482918		5.1	-	-	0.246615	0.977015	0.191812	0.808615	0.137008	0.656133
Anchiornis	3.8	-	-	0.370708	0.364269	0.288328	0.287777	0.205949	0.22029		4.1	-	-	0.370708	0.393578	0.288328	0.313891	0.205949	0.243208		5.1	-	-	0.370708	0.499464	0.288328	0.409125	0.205949	0.327792
Archaeopteryx	3.8	-	-	0.483177	2.07086	0.375804	1.56289	0.268432	1.12628		4.1	-	-	0.483177	2.20686	0.375804	1.68132	0.268432	1.22715		5.1	-	-	0.483177	2.69144	0.375804	2.10734	0.268432	1.59461
Archaeopteryx	3.8	-	-	0.483177	1.25414	0.375804	0.957372	0.268432	0.700607		4.1	-	-	0.483177	1.34108	0.375804	1.03352	0.268432	0.765956		5.1	-	-	0.483177	1.65193	0.375804	1.30838	0.268432	1.00483
Archaeopteryx	3.8	-	-	0.457102	1.26532	0.355524	0.96933	0.253945	0.712718		4.1	-	-	0.457102	1.35448	0.355524	1.04755	0.253945	0.780008		5.1	-	-	0.457102	1.67358	0.355524	1.33022	0.253945	1.02623
Archaeopteryx	3.8	-	-	0.512708	1.77709	0.398773	1.34029	0.284838	0.964995		4.1	-	-	0.512708	1.89342	0.398773	1.44156	0.284838	1.0512		5.1	-	-	0.512708	2.30783	0.398773	1.80577	0.284838	1.36521
Archaeopteryx	3.8	-	-	0.512708	1.01636	0.398773	0.776348	0.284838	0.568616		4.1	-	-	0.512708	1.08702	0.398773	0.838257	0.284838	0.62177		5.1	-	-	0.512708	1.33972	0.398773	1.06177	0.284838	0.816101
Archaeopteryx	3.8	-	-	0.411549	1.88104	0.320093	1.43551	0.228638	1.0501		4.1	-	-	0.411549	2.01127	0.320093	1.54955	0.228638	1.14795		5.1	-	-	0.411549	2.47683	0.320093	1.96115	0.228638	1.5056
Archaeopteryx	3.8	-	-	0.411549	1.2322	0.320093	0.949569	0.228638	0.703706		4.1	-	-	0.411549	1.32138	0.320093	1.02804	0.228638	0.771478		5.1	-	-	0.411549	1.64113	0.320093	1.31212	0.228638	1.01988
Archaeopteryx	3.8	-	-	0.426157	2.04195	0.331455	1.55419	0.236754	1.1329		4.1	-	-	0.426157	2.18159	0.331455	1.67631	0.236754	1.23749		5.1	-	-	0.426157	2.68038	0.331455	2.11671	0.236754	1.6195
Archaeopteryx	3.8	-	-	0.426157	1.31743	0.331455	1.01289	0.236754	0.748327		4.1	-	-	0.426157	1.41179	0.331455	1.09583	0.236754	0.819843		5.1	-	-	0.426157	1.74987	0.331455	1.39585	0.236754	1.0818
Archaeopteryx	3.8	-	-	0.458987	1.98393	0.35699	1.50381	0.254993	1.0901		4.1	-	-	0.458987	2.11698	0.35699	1.61992	0.254993	1.18928		5.1	-	-	0.458987	2.59164	0.35699	2.03815	0.254993	1.55106
Archaeopteryx	3.8	-	-	0.291854	1.1823	0.226998	0.928676	0.162141	0.705638		4.1	-	-	0.291854	1.2752	0.226998	1.01121	0.162141	0.777808		5.1	-	-	0.291854	1.61024	0.226998	1.3117	0.162141	1.04375
Archaeopteryx	3.8	-	-	0.291854	0.878109	0.226998	0.69459	0.162141	0.53256		4.1	-	-	0.291854	0.949124	0.226998	0.757903	0.162141	0.58817		5.1	-	-	0.291854	1.20578	0.226998	0.988885	0.162141	0.793477
Aurornis	3.8	-	-	0.351858	0.31575	0.273668	0.251076	0.195477	0.193806		4.1	-	-	0.351858	0.341832	0.273668	0.27439	0.195477	0.214352		5.1	-	-	0.351858	0.436244	0.273668	0.359576	0.195477	0.290311
Caudipteryx	3.8	-	-	0.541925	0.0671555	0.421497	0.0546818	0.301069	0.0434886		4.1	-	-	0.541925	0.0732317	0.421497	0.0601776	0.301069	0.0484039		5.1	-	-	0.541925	0.0953858	0.421497	0.080397	0.301069	0.0666885
Caudipteryx	3.8	-	-	0.431969	0.043728	0.335976	0.0361984	0.239983	0.0293798		4.1	-	-	0.431969	0.0479274	0.335976	0.0400279	0.239983	0.0328393		5.1	-	-	0.431969	0.0633158	0.335976	0.0541831	0.239983	0.0457614
Changyuraptor	3.8	-	-	1.065	0.472336	0.828333	0.35384	0.591667	0.252428		4.1	-	-	1.065	0.502243	0.828333	0.379786	0.591667	0.274414		5.1	-	-	1.065	0.60856	0.828333	0.472904	0.591667	0.354331
Confuciusornis	3.8	0.798663	12.0819	0.502655	6.42795	0.390954	4.75418	0.279253	3.33237		4.1	0.798663	12.6023	0.502655	6.80899	0.390954	5.08265	0.279253	3.60827		5.1	0.798663	14.4161	0.502655	8.15837	0.390954	6.25678	0.279253	4.60715
Confuciusornis	3.8	0.798663	8.20155	0.502655	4.42345	0.390954	3.29846	0.279253	2.33825		4.1	0.798663	8.57263	0.502655	4.69706	0.390954	3.53529	0.279253	2.5383		5.1	0.798663	9.86885	0.502655	5.66838	0.390954	4.38402	0.279253	3.26443
Eoconfuciusornis	3.8	0.546585	5.06629	0.344004	2.86145	0.267559	2.192	0.191114	1.61163		4.1	0.546585	5.33339	0.344004	3.06304	0.267559	2.36887	0.191114	1.76377		5.1	0.546585	6.27327	0.344004	3.78454	0.267559	3.00797	0.191114	2.32047
Eoconfuciusornis	3.8	0.546585	3.84229	0.344004	2.1936	0.267559	1.69076	0.191114	1.25328		4.1	0.546585	4.05167	0.344004	2.35249	0.267559	1.83059	0.191114	1.37406		5.1	0.546585	4.78971	0.344004	2.92221	0.267559	2.33679	0.191114	1.81674
Eosinopteryx	3.8	-	-	0.247793	0.406094	0.192728	0.327745	0.137663	0.257784		4.1	-	-	0.247793	0.441635	0.192728	0.359749	0.137663	0.286253		5.1	-	-	0.247793	0.57087	0.192728	0.477196	0.137663	0.391912
Jeholornis	3.8	1.02304	6.82913	0.643869	3.60249	0.500787	2.65078	0.357705	1.84476		4.1	1.02304	7.11405	0.643869	3.81023	0.500787	2.82939	0.357705	1.99424		5.1	1.02304	8.10585	0.643869	4.54474	0.500787	3.46681	0.357705	2.53458
Jeholornis	3.8	1.02304	3.68451	0.643869	1.98595	0.500787	1.48032	0.357705	1.04884		4.1	1.02304	3.85084	0.643869	2.10855	0.500787	1.58642	0.357705	1.13844		5.1	1.02304	4.43179	0.643869	2.54374	0.500787	1.96661	0.357705	1.46362
Jeholornis	3.8	1.36272	8.8152	0.857655	4.51239	0.667065	3.25964	0.476475	2.21014		4.1	1.36272	9.14148	0.857655	4.74668	0.667065	3.45921	0.476475	2.37499		5.1	1.36272	10.2719	0.857655	5.57045	0.667065	4.16726	0.476475	2.96733
Jeholornis	3.8	1.36272	4.08556	0.857655	2.14458	0.667065	1.57329	0.476475	1.09032		4.1	1.36272	4.25283	0.857655	2.26623	0.667065	1.67773	0.476475	1.17754		5.1	1.36272	4.83464	0.857655	2.69598	0.667065	2.05009	0.476475	1.49252
Jianchangosaurus	3.8	-	-	0.623292	0.00783448	0.484783	0.00644692	0.346273	0.0051945		4.1	-	-	0.623292	0.0085711	0.484783	0.00711667	0.346273	0.00579738		5.1	-	-	0.623292	0.0112655	0.484783	0.00958816	0.346273	0.00804596
Jinfengopteryx	3.8	-	-	0.273161	0.122112	0.212459	0.100725	0.151756	0.0813955		4.1	-	-	0.273161	0.133691	0.212459	0.111266	0.151756	0.0908977		5.1	-	-	0.273161	0.176078	0.212459	0.15019	0.151756	0.126359
Mahakala	3.8	-	-	0.317301	0.177926	0.24679	0.145673	0.176278	0.116643		4.1	-	-	0.317301	0.194351	0.24679	0.16057	0.176278	0.130011		5.1	-	-	0.317301	0.254339	0.24679	0.215462	0.176278	0.179808
Mei long	3.8	-	-	0.194779	0.0619426	0.151495	0.0527508	0.10821	0.0442968		4.1	-	-	0.194779	0.0684909	0.151495	0.0588065	0.10821	0.0498598		5.1	-	-	0.194779	0.0926945	0.151495	0.0813678	0.10821	0.0707789
Mei long	3.8	-	-	0.229336	0.0437266	0.178373	0.0372437	0.127409	0.0312807		4.1	-	-	0.229336	0.0483515	0.178373	0.041521	0.127409	0.0352104		5.1	-	-	0.229336	0.0654468	0.178373	0.0574575	0.127409	0.0499881
Microraptor	3.8	-	-	0.373692	1.42856	0.29065	1.1021	0.207607	0.817933		4.1	-	-	0.373692	1.53246	0.29065	1.19358	0.207607	0.89699		5.1	-	-	0.373692	1.90511	0.29065	1.52483	0.207607	1.18685
Microraptor	3.8	-	-	0.644026	1.12879	0.500909	0.853118	0.357792	0.615976		4.1	-	-	0.644026	1.20343	0.500909	0.918166	0.357792	0.671429		5.1	-	-	0.644026	1.46951	0.500909	1.15225	0.357792	0.873528
Microraptor hanqingi	3.8	-	-	0.734033	0.555518	0.570915	0.423251	0.407796	0.30894		4.1	-	-	0.734033	0.593686	0.570915	0.456647	0.407796	0.337565		5.1	-	-	0.734033	0.730071	0.570915	0.577127	0.407796	0.442139
Protoarchaeopteryx	3.8	-	-	0.402124	0.0264496	0.312763	0.0218524	0.223402	0.0176937		4.1	-	-	0.402124	0.0289721	0.312763	0.0241505	0.223402	0.0197674		5.1	-	-	0.402124	0.0382104	0.312763	0.0326406	0.223402	0.0275093
Sapeornis	3.8	1.09816	4.36766	0.69115	2.315	0.537561	1.70833	0.383972	1.19366		4.1	1.09816	4.55317	0.69115	2.45059	0.537561	1.82507	0.383972	1.29156		5.1	1.09816	5.19941	0.69115	2.9304	0.537561	2.24208	0.383972	1.64576
Sapeornis	3.8	1.09816	2.12266	0.69115	1.15417	0.537561	0.864795	0.383972	0.617108		4.1	1.09816	2.22146	0.69115	1.22732	0.537561	0.928266	0.383972	0.670899		5.1	1.09816	2.56703	0.69115	1.48739	0.537561	1.15606	0.383972	0.866432
Sapeornis	3.8	1.4326	6.08067	0.901637	3.1226	0.701273	2.26017	0.500909	1.53682		4.1	1.4326	6.30876	0.901637	3.28665	0.701273	2.40005	0.500909	1.65253		5.1	1.4326	7.09939	0.901637	3.86381	0.701273	2.89665	0.500909	2.06857
Sapeornis	3.8	1.4326	2.61531	0.901637	1.38102	0.701273	1.01681	0.500909	0.708234		4.1	1.4326	2.72484	0.901637	1.46092	0.701273	1.08553	0.500909	0.765773		5.1	1.4326	3.10618	0.901637	1.74349	0.701273	1.33082	0.500909	0.973798
Similicaudipteryx	3.8	-	-	0.628319	0.149081	0.488692	0.118297	0.349066	0.0910688		4.1	-	-	0.628319	0.161293	0.488692	0.129201	0.349066	0.100665		5.1	-	-	0.628319	0.205468	0.488692	0.169018	0.349066	0.136125
Similicaudipteryx	3.8	-	-	0.113097	0.0765424	0.0879646	0.0661735	0.0628319	0.0565589		4.1	-	-	0.113097	0.0850336	0.0879646	0.0740843	0.0628319	0.0638894		5.1	-	-	0.113097	0.116563	0.0879646	0.103679	0.0628319	0.0915492
Sinocalliopteryx	3.8	-	-	0.578053	0.00986109	0.449597	0.00823738	0.321141	0.00675963		4.1	-	-	0.578053	0.0108384	0.449597	0.00913261	0.321141	0.00757277		5.1	-	-	0.578053	0.0144296	0.449597	0.0124502	0.321141	0.0106167
Sinornithodes	3.8	-	-	0.493387	0.0358144	0.383746	0.0292762	0.274104	0.0233963		4.1	-	-	0.493387	0.0391017	0.383746	0.0322552	0.274104	0.0260671		5.1	-	-	0.493387	0.0511017	0.383746	0.0432277	0.274104	0.0360121
Sinornithosaurus	3.8	-	-	0.406836	0.0395613	0.316428	0.0323818	0.22602	0.0259206		4.1	-	-	0.406836	0.0432101	0.316428	0.0356906	0.22602	0.0288894		5.1	-	-	0.406836	0.056535	0.316428	0.0478822	0.22602	0.0399477
Sinornithosaurus	3.8	-	-	0.304734	0.203732	0.237016	0.163715	0.169297	0.128069		4.1	-	-	0.304734	0.221269	0.237016	0.179473	0.169297	0.142048		5.1	-	-	0.304734	0.284955	0.237016	0.237229	0.169297	0.193875
Sinosauropteryx	3.8	-	-	0.149226	0.00495907	0.116064	0.00442663	0.0829031	0.00392443		4.1	-	-	0.149226	0.00556501	0.116064	0.00500009	0.0829031	0.00446539		5.1	-	-	0.149226	0.00783701	0.116064	0.00716379	0.0829031	0.0065208
Sinosauropteryx	3.8	-	-	0.071	0.00167932	0.0552222	0.00154488	0.0394444	0.00141604		4.1	-	-	0.071	0.00190269	0.0552222	0.0017594	0.0394444	0.00162172		5.1	-	-	0.071	0.00274794	0.0552222	0.00257518	0.0394444	0.00240802
Sinovenator	3.8	-	-	0.374635	0.0397135	0.291383	0.033036	0.208131	0.0269727		4.1	-	-	0.374635	0.0435931	0.291383	0.0365823	0.208131	0.0301858		5.1	-	-	0.374635	0.0578305	0.291383	0.049709	0.208131	0.0422018
Tianyuraptor	3.8	-	-	0.614181	0.0174108	0.477697	0.0143145	0.341212	0.0115212		4.1	-	-	0.614181	0.0190426	0.477697	0.0157976	0.341212	0.0128554		5.1	-	-	0.614181	0.0250098	0.477697	0.0212689	0.341212	0.0178308
Xiaotingia	3.8	-	-	0.376991	0.149285	0.293215	0.120358	0.20944	0.0945436		4.1	-	-	0.376991	0.162299	0.293215	0.132071	0.20944	0.104956		5.1	-	-	0.376991	0.209605	0.293215	0.175041	0.20944	0.143589
Yixianosaurus	3.8	-	-	0.45396	0.15208	0.35308	0.121435	0.2522	0.0942338		4.1	-	-	0.45396	0.164851	0.35308	0.132874	0.2522	0.104342		5.1	-	-	0.45396	0.21114	0.35308	0.174724	0.2522	0.141752
Yixianosaurus	3.8	-	-	0.45396	0.0962427	0.35308	0.0776821	0.2522	0.0611079		4.1	-	-	0.45396	0.104669	0.35308	0.0852704	0.2522	0.0678581		5.1	-	-	0.45396	0.13531	0.35308	0.113118	0.2522	0.0929122
Yulong	3.8	-	-	0.286042	0.141408	0.222477	0.116251	0.158912	0.0935563		4.1	-	-	0.286042	0.154658	0.222477	0.128292	0.158912	0.104389		5.1	-	-	0.286042	0.203108	0.222477	0.172713	0.158912	0.144781
Zhenyuanlog	3.8	-	-	0.914361	0.114399	0.711169	0.0892748	0.507978	0.0672614		4.1	-	-	0.914361	0.123145	0.711169	0.0970193	0.507978	0.0740049		5.1	-	-	0.914361	0.154623	0.711169	0.125161	0.507978	0.0988096
